# Supplementary material for: Repeated electromagnetic field stimulation lowers amyloid-β peptide levels in primary human mixed brain tissue cultures
Source: PubMed Central journal article supplement (PMC7804462; doi:10.1038/s41598-020-77808-2), 2021-01-12
Supplement: 41598_2020_77808_MOESM1_ESM.pdf [file 41598_2020_77808_MOESM1_ESM.pdf]

**REPEATED ELECTROMAGNETIC FIELD STIMULATION LOWERS AMYLOID-  
BETA PEPTIDE LEVELS IN PRIMARY HUMAN NEURON-RICH BRAIN TISSUE  
CULTURES**

Felipe P. Perez,<sup>2</sup> Bryan Maloney,<sup>1</sup> Nipun Chopra,<sup>1</sup> Jorge J. Morisaki,<sup>3</sup> and Debomoy K. Lahiri<sup>1</sup>

<sup>1</sup>Department of Psychiatry, Institute of Psychiatric Research, Neuroscience Research Center, Indiana University School of Medicine, Indianapolis, IN, USA.

<sup>2</sup>Department of Medicine, Division of General Internal Medicine and Geriatrics, Aging for Center Research, Indiana University School of Medicine, Indianapolis, IN, USA.

<sup>3</sup>Department of Bioengineering, University of Illinois at Chicago, Chicago, IL, USA.

Corresponding author

Dr. D. K Lahiri

Neuroscience Research Center

320 W. 15<sup>th</sup> St., Indianapolis IN 46201, USA

Tel: (317) 274-2706

E-mails: [dlahiri@iupui.edu](mailto:dlahiri@iupui.edu)

## REMF reduces A $\beta$

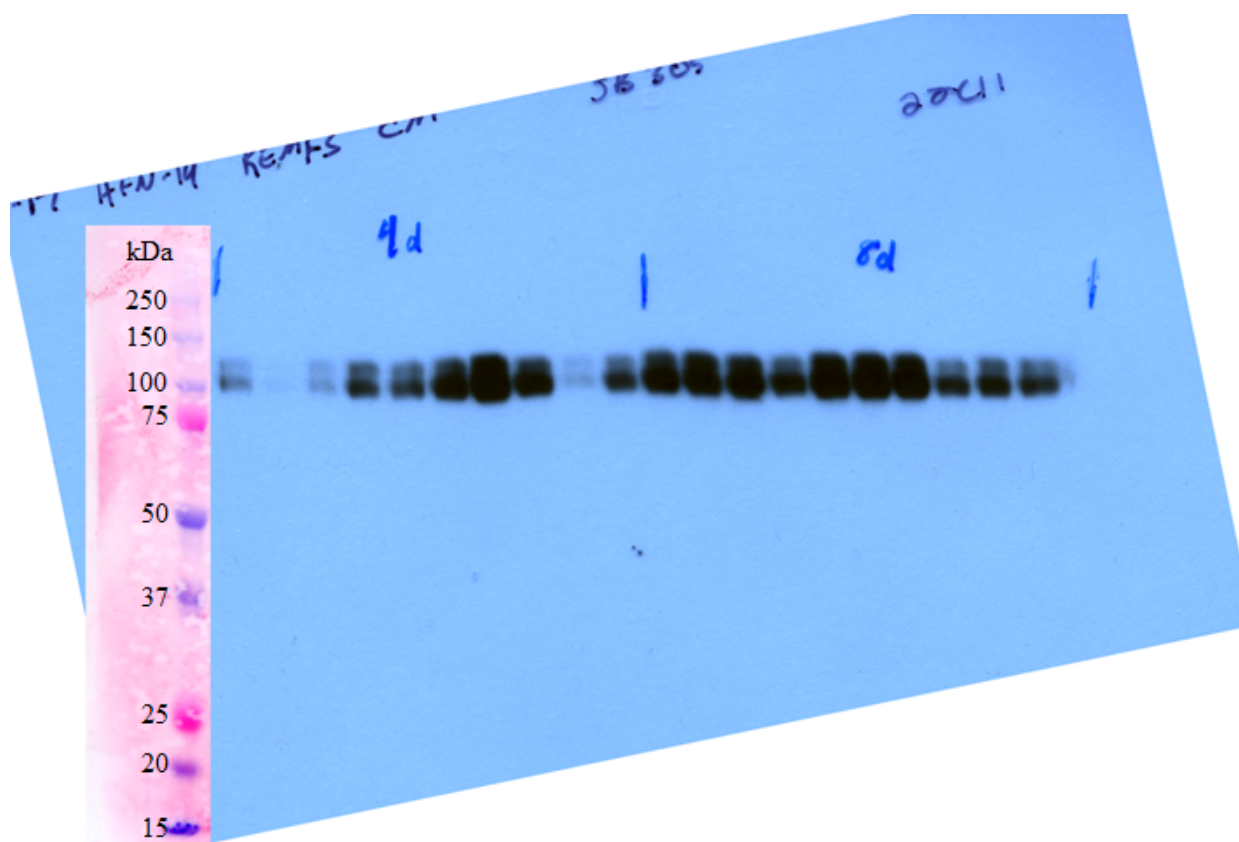

**Fig. S1.** Total sAPP was measured by semiquantitative western blotting of CM from PHB-DIV28 exposed to REMFS at 64 MHz with SAR of 0.9 W/Kg for 4 or 8 days, as described in the main text. Un-edited scan of X-ray film with superimposed protein MW standard (BioRad 1610374) scanned from Ponceau-S stain of blot before antibody probing.
